# Supplementary material for: Catalyst + chemodosimeter → chemosensor: incorporation of catalytic functionality in an indicator displacement assay to realize reversible chemosensing detection
Source: Royal Society of Chemistry journal article supplement (doi:10.1039/c9tc06308k), 2020-01-01
Supplement: c9tc06308k1.pdf [file c9tc06308k1.pdf]

## **Supporting Information**

### **Catalyst + Chemodosimeter → Chemosensor: Incorporation of a catalytic functionality in an indicator displacement assay to realize reversible chemosensing detection**

Chang Shen, Qian Tang, Cheng-Bin Gong,<sup>\*</sup> and Cheuk-Fai Chow<sup>\*</sup>

Department of Science and Environmental Studies, Centre for Education in Environmental Sustainability, The Education University of Hong Kong, 10 Lo Ping Road, Tai Po Hong Kong SAR, China and College of Chemistry and Chemical Engineering, Southwest University, Chong Qing, China

<sup>\*</sup>Email: [cfchow@eduhk.hk](mailto:cfchow@eduhk.hk)

## EXPERIMENTAL

**Materials and Physical instrumentation.**  $(\text{NH}_4)_2\text{Fe}(\text{SO}_4)_2 \cdot 6\text{H}_2\text{O}$ , 2,3,5,6-tetra(2'-pyridyl)pyrazine (tppz), benzyltriphenylphosphonium bromide (BTPPC), and potassium cyanide were obtained from Aldrich.  $\text{CuCl}_2$  was obtained from Fluka. A Vario EL CHN analyzer was used to conduct the elemental analyses. Infrared spectra in the  $500\text{--}4000\text{ cm}^{-1}$  range were recorded using a Perkin Elmer Model Frontier FTIR spectrometer using KBr pellets. UV-vis spectra were recorded on a Cary 50 ultraviolet-visible spectrophotometer. Ion chromatographic studies were conducted by using a 930 Compact IC Flex (Metrohm, Switzerland) system with a Metrosep A Supp 7-250/4.0 column; aqueous  $\text{Na}_2\text{CO}_3$  (3.6 mM with pH 10.7) was used as the mobile phase at a flow rate of 0.7 mL/min, while the operation temperature and pressure were 323 K and 11.1 MPa, respectively. The retention time of  $\text{OCN}^-$  was found to be 13.44 min. Electrospray mass spectrometry (ESI-MS) was performed using a Waters Synapt G2-Si Ion Mobility Quadrupole MS system.

**UV-Vis Spectroscopic Titrations.** Phosphate buffer (pH 7, 0.02 M) was used in all the UV-vis spectroscopic titrations. Except for  $\text{NH}_4\text{SCN}$  and  $\text{NaN}_3$ , all the anions ( $\text{CN}^-$ ,  $\text{SO}_4^{2-}$ ,  $\text{HCO}_3^-$ ,  $\text{HPO}_4^{2-}$ ,  $\text{CH}_3\text{COO}^-$ ,  $\text{NO}_3^-$ ,  $\text{NCO}^-$ , and  $\text{Cl}^-$ ) used in the titrations were potassium salts. All the UV-vis spectroscopic measurements were taken after equilibrium was reached. Receptor-substrate interaction was analyzed by using Benesi–Hildebrand equations.<sup>8</sup>

**Binding Properties of (i) Complex 1 Toward  $\text{CN}^-$ , (ii)  $\text{Cu}^{2+}$  toward  $\text{CN}^-$ , and (iii)  $[\text{Fe}(\text{tppz})(\text{CN})_3]^-$  Toward  $\text{Cu}^{2+}$ .** For the binding properties of (i) and (ii), a series of  $\text{CN}^-$  solutions ( $0\text{--}1.0 \times 10^{-3}\text{ M}$ ) was mixed with the receptor solution (complex 1 or  $\text{Cu}^{2+}$ :  $1.0 \times 10^{-4}\text{ M}$ ). While the binding properties of (iii) were evaluated with the titration of  $[\text{Fe}(\text{tppz})(\text{CN})_3]^-$  solutions ( $1.0 \times 10^{-4}\text{ M}$ ) by  $\text{Cu}^{2+}$  ( $0\text{--}4.0 \times 10^{-4}\text{ M}$ ). All the titrations were carried out in the phosphate buffer at 298 K. The changes in the UV-vis spectra of the resulting mixtures were plotted as functions of the mole fraction of the analyte. The binding constants<sup>8</sup> and method detection limits<sup>9</sup> were evaluated from the spectroscopic changes.

**[BTTPC][Fe(tppz)(CN)<sub>3</sub>]**. The complex was synthesized by modification of a reported method.<sup>11</sup> An aqueous ethanolic solution of (NH<sub>4</sub>)<sub>2</sub>Fe(SO<sub>4</sub>)<sub>2</sub>·6H<sub>2</sub>O (392 mg, 1 mmol in deionized water:ethanol, v:v, 1:1, 50 mL) was added dropwise to a solution of 2,3,5,6-tetra(2'-pyridyl)pyrazine (tppz) (776 mg, 2 mmol in deionized water:ethanol, v:v, 1:1, 50 mL). The mixture was stirred and refluxed for 3 h. [Fe(tppz)<sub>2</sub>]SO<sub>4</sub> was obtained by slow evaporation of the solvents. The purple solids obtained and KCN (650 mg, 10 mmol) were re-dissolved and stirred in water (50 mL) for 1 h. During the reaction, tppz ligand (~350 mg) was precipitated out as a white solid. Excess benzyltriphenylphosphonium bromide (BTTPC) (2.16 g, 5 mmol, 50 mL) in a hot aqueous solution was slowly added to the stirred mixture. The dark-blue solids precipitated out were collected by filtering, washed with deionized water, and air-dried at room temperature (800 mg, 91.4%). IR (KBr):  $\nu_{\text{C}\equiv\text{N}} = 2077$  and  $2107 \text{ cm}^{-1}$ . High-resolution ESI-MS (negative mode):  $m/z$  522.0898 {Fe(tppz)(CN)<sub>3</sub>}<sup>-</sup> (calculated mass: 522.0875 amu); <sup>1</sup>H NMR (500 MHz, d<sub>6</sub>-DMSO)  $\delta$ : 8.89 (d, J = 5.0 Hz, 2H), 8.75–8.76 (m, 2H), 8.18–8.21 (m, 2H), 8.13 (d, J = 7.5 Hz, 2H), 7.90 (m, 3H), 7.73–7.75 (m, 8H), 7.67 (m, 6H), 7.65 (m, 2H), 7.39 (m, 2H), 7.30 (m, 1H), 7.22–7.25 (t, 2H), 7.00 (d, J = 8.5 Hz, 2H), 6.96 (m, J = 9.5 Hz, 2H), 5.13 (d, J = 16 Hz, 2H). <sup>13</sup>C NMR (500 MHz, D<sub>6</sub>-DMSO): 117.44, 118.13, 124.07, 124.90, 125.06, 125.30, 127.82, 128.84, 128.86, 128.86, 130.07, 130.17, 130.79, 130.83, 133.70, 133.96, 134.04, 135.15, 138.31, 147.21, 149.42, 150.05, 151.18, 152.64, 155.02, 155.46, 156.03. Anal. calc. for C<sub>52</sub>FeH<sub>38</sub>N<sub>9</sub>P·6H<sub>2</sub>O: C, 63.48; H, 5.12; N, 12.81. Found C, 64.04; H, 5.17; N, 12.47.

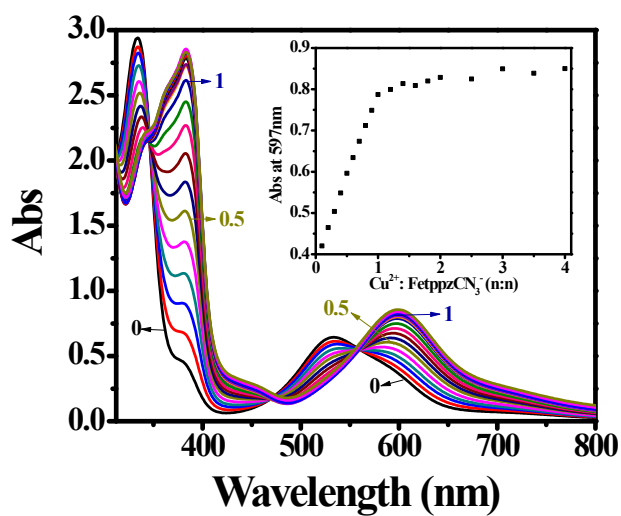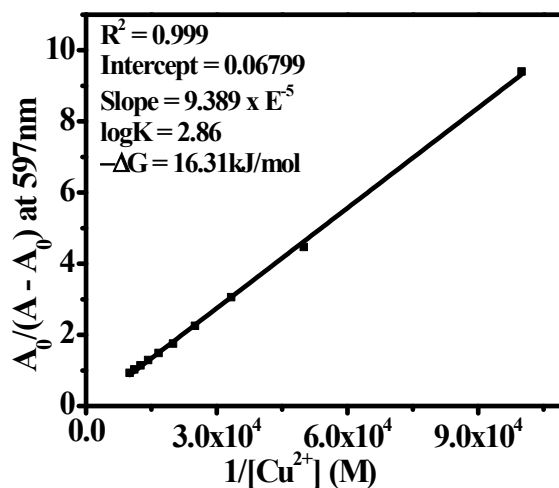

**S. Figure 1.** (a) UV–Vis spectroscopic titrations of [BTTPC][Fe(tppz)(CN)<sub>3</sub>] ( $1 \times 10^{-4}$  M) with CuCl<sub>2</sub> ( $0\text{--}4 \times 10^{-4}$  M) and (b) the slope and y-intercept are  $9.39 \times 10^{-5}$  M and 0.068, respectively,  $\log K = 2.86$ . All the experiments were carried out in pH 7 phosphate buffer (0.02 M) at 298 K.

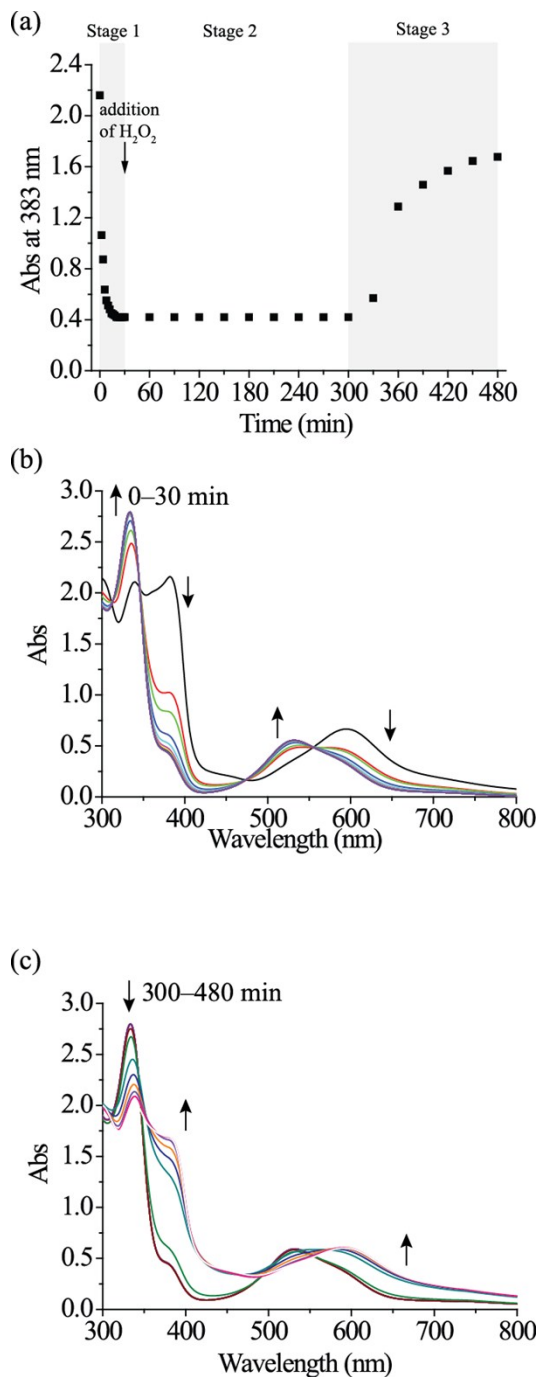

**S.Figure 2.** (a) The absorbance changes at 383 nm of the mixture containing complex **1** ( $1 \times 10^{-4}$  M), CN<sup>-</sup> ( $1 \times 10^{-3}$  M), and H<sub>2</sub>O<sub>2</sub> ( $2 \times 10^{-3}$  M) with respect to the reaction time. The UV-Vis spectra of the above-mentioned reaction (b) from the 0-30 min, and (c) from 300-480 min. All the experiments were carried out in deionized water at 298 K.
